# Supplementary material for: Experimental and theoretical studies on the linear and nonlinear optical properties of lead phosphate crystals LiPbPO4
Source: Royal Society of Chemistry journal article supplement (doi:10.1039/c6cp02672a), 2016-01-01
Supplement: c6cp02672a1.pdf [file c6cp02672a1.pdf]

## Supporting Information

### Experimental and Theoretical Studies on the Linear and Nonlinear Optical Properties of Lead Phosphate Crystal $\text{LiPbPO}_4$

Guopeng Han,<sup>a,b</sup> Qiong Liu,<sup>a,b</sup> Ying Wang,<sup>\*,a</sup> Xin Su,<sup>a,b</sup> Zhihua Yang,<sup>a</sup> and Shilie Pan<sup>\*,a</sup>

*<sup>a</sup>Key Laboratory of Functional Materials and Devices for Special Environments,  
Xinjiang Technical Institute of Physics & Chemistry, Chinese Academy of Sciences,  
Xinjiang Key Laboratory of Electronic Information Materials and Devices, No. 40-1,  
South Beijing Road, Urumqi 830011, China*

*<sup>b</sup>University of Chinese Academy of Sciences, Beijing 100049, China*

*\*To whom correspondence should be addressed.*

E-mail: wangying@ms.xjb.ac.cn, slpan@ms.xjb.ac.cn

Phone: (+86)991-3674558, Fax: (+86)991-3838957

**Table S1.** Atomic coordinates ( $\times 10^4$ ), equivalent isotropic displacement parameters ( $\text{\AA}^2 \times 10^3$ ) for  $\text{LiPbPO}_4$ .  $U(\text{eq})$  is defined as one third of the trace of the orthogonalized  $U_{ij}$  tensor.

| Atoms | Wyck. | $x$      | $y$      | $z$       | $U(\text{eq})$ |
|-------|-------|----------|----------|-----------|----------------|
| Pb(1) | 4a    | 3257(10) | 4465(10) | 885(10)   | 12(10)         |
| Pb(2) | 4a    | 4727(10) | 2290(10) | 729(20)   | 15(10)         |
| P(1)  | 4a    | 2670(40) | 716(20)  | 379(10)   | 8(10)          |
| P(2)  | 4a    | 2877(50) | 3204(20) | 5339(90)  | 8(10)          |
| Li(1) | 4a    | 4910(30) | 592(12)  | -4610(60) | 11(50)         |
| Li(2) | 4a    | 1800(30) | 1489(13) | -4640(60) | 12(60)         |
| O(1)  | 4a    | 2815(13) | 738(60)  | 3460(20)  | 9(20)          |
| O(2)  | 4a    | 2479(13) | 1478(60) | -790(20)  | 12(20)         |
| O(3)  | 4a    | 1367(13) | 3645(60) | 4540(20)  | 17(30)         |
| O(4)  | 4a    | 3087(14) | 3180(70) | 8420(20)  | 16(30)         |
| O(5)  | 4a    | 1082(13) | 275(60)  | -440(20)  | 11(20)         |
| O(6)  | 4a    | 4160(14) | 342(60)  | -930(20)  | 11(20)         |
| O(7)  | 4a    | 4436(13) | 3531(60) | 3990(20)  | 13(20)         |
| O(8)  | 4a    | 2695(14) | 2445(60) | 4200(20)  | 14(20)         |

**Table S2.** Selected bond lengths (Å) and angles (°) for LiPbPO<sub>4</sub>.

|                      |             |                       |             |
|----------------------|-------------|-----------------------|-------------|
| Pb(1)-O(5)#1         | 2.410(10)   | O(4)#3-Pb(1)-O(6)#11  | 85.753(30)  |
| Pb(1)-O(5)#2         | 2.431(11)   | O(1)#13-Pb(1)-O(3)    | 124.969(31) |
| Pb(1)-O(7)           | 2.513(12)   | O(1)#13-Pb(1)-O(6)#2  | 64.076(31)  |
| Pb(1)-O(4)#3         | 2.698(12)   | O(1)#13-Pb(1)-O(6)#11 | 60.211(28)  |
| Pb(1)-O(1) #2        | 2.8018(11)  | O(3)-Pb(1)-O(6)#2     | 66.954(29)  |
| Pb(1)-O(3)           | 2.8183(10)  | O(3)-Pb(1)-O(6)#11    | 73.153(28)  |
| Pb(1)-O(6)#2         | 2.9917(11)  | O6#2-Pb(1)-O(6)#11    | 57.272(29)  |
| Pb(1)-O(6)#11        | 3.4289(12)  | O(8)-Pb(2)-O(7)       | 55.486(33)  |
| Pb(2)-O(8)           | 2.389(11)   | O(8)-Pb(2)-O(3)#1     | 84.971(32)  |
| Pb(2)-O(4)#3         | 2.411(12)   | O(8)-Pb(2)-O(8)#1     | 96.214(33)  |
| Pb(2)-O(2)           | 2.474(11)   | O(8)-Pb(2)-O(4)#6     | 155.03(33)  |
| Pb(2)-O(7)           | 2.8389(11)  | O(8)-Pb(2)-O(2)#1     | 122.684(32) |
| Pb(2)-O(3)#1         | 2.8921(11)  | O(4)#3-Pb(2)-O(7)     | 70.260(37)  |
| Pb(2)-O(8)#1         | 2.9821(11)  | O(4)#3-Pb(2)-O(3)#1   | 167.472(34) |
| Pb(2)-O(4) #6        | 3.0594(12)  | O(4)#3-Pb(2)-O(8)#1   | 126.578(33) |
| Pb(2)-O(2)#1         | 3.2795(11)  | O(4)#3-Pb(2)-O(4)#6   | 120.063(35) |
| P(1)-O(6)            | 1.529(11)   | O(4)#3-Pb(2)-O(2)#1   | 76.918(34)  |
| P(1)-O(1)            | 1.534(11)   | O(2)-Pb(2)-O(7)       | 127.935(33) |
| P(1)-O(2)            | 1.546(12)   | O(2)-Pb(2)-O(3)#1     | 99.278(32)  |
| P(1)-O(5)            | 1.571(11)   | O(2)-Pb(2)-O(8)#1     | 149.383(32) |
| P(2)-O(3)            | 1.519(11)   | O(2)-Pb(2)-O(4)#6     | 110.660(32) |
| P(2)-O(8)            | 1.536(12)   | O(2)-Pb(2)-O(2)#1     | 148.374(31) |
| P(2)-O(4)            | 1.542(11)   | O(7)-Pb(2)-O(3)#1     | 99.082(31)  |
| P(2)-O(7)            | 1.546(11)   | O(7)-Pb(2)-O(8)#1     | 66.428(29)  |
| Li(1)-O(3)#6         | 1.89(20)    | O(7)-Pb(2)-O(4)#6     | 121.372(30) |
| Li(1)-O(1)#3         | 1.95(30)    | O(7)-Pb(2)-O(2)#1     | 67.200(29)  |
| Li(1)-O(6)           | 1.98(30)    | O(3)#1-Pb(2)-O(8)#1   | 50.107(29)  |
| Li(1)-O(6)#7         | 2.01(30)    | O(3)#1-Pb(2)-O(4)#6   | 70.766(30)  |
| Li(2)-O(1)#3         | 1.88(30)    | O(3)#1-Pb(2)-O(2)#1   | 105.540(28) |
| Li(2)-O(2)           | 1.99(30)    | O(8)#1-Pb(2)-O(4)#6   | 63.886(30)  |
| Li(2)-O(8)#3         | 2.01(30)    | O(8)#1-Pb(2)-O(2)#1   | 58.520(28)  |
| Li(2)-O(7)#10        | 2.01(30)    | O4#6-Pb(2)-O(2)#1     | 61.402(28)  |
| O(5)#1-Pb(1)-O(5)#2  | 82.7(30)    | O(8)-Pb(2)-O(4)#3     | 83.4(40)    |
| O(5)#1-Pb(1)-O(7)    | 87.3(30)    | O(8)-Pb(2)-O(2)       | 78.2(40)    |
| O(7)-Pb(1)-O(4)#3    | 71.2(30)    | O(4)#3-Pb(2)-O(2)     | 83.1(40)    |
| O(5)#2-Pb(1)-O(7)    | 83.7(40)    | O(6)-P(1)-O(1)        | 112.1(60)   |
| O(5)#1-Pb(1)-O(4)#3  | 96.0(40)    | O(6)-P(1)-O(2)        | 109.9(60)   |
| O(5)#2-Pb(1)-O(4)#3  | 154.9(40)   | O(1)-P(1)-O(2)        | 110.9(60)   |
| O(5)#1-Pb(1)-O(1)#13 | 90.024(34)  | O(6)-P(1)-O(5)        | 106.6(60)   |
| O(5)#1-Pb(1)-O(3)    | 142.343(33) | O(1)-P(1)-O(5)        | 109.4(60)   |
| O(5)#1-Pb(1)-O(6)#2  | 130.078(33) | O(2)-P(1)-O(5)        | 107.8(60)   |
| O(5)#1-Pb(1)-O(6)#11 | 144.023(31) | O(3)-P(2)-O(8)        | 109.2(70)   |

|                      |             |                     |           |
|----------------------|-------------|---------------------|-----------|
| O(5)#2-Pb(1)-O(1)#13 | 81.995(34)  | O(3)-P(2)-O(4)      | 111.3(70) |
| O(5)#2-Pb(1)-O(3)    | 88.444(32)  | O(8)-P(2)-O(4)      | 110.5(70) |
| O(5)#2-Pb(1)-O(6)#2  | 53.369(32)  | O(3)-P(2)-O(7)      | 108.5(70) |
| O(5)#2-Pb(1)-O(6)#11 | 109.959(30) | O(8)-P(2)-O(7)      | 106.3(60) |
| O(7)-Pb(1)-O(1)#13   | 165.647(33) | O(4)-P(2)-O(7)      | 110.8(60) |
| O(7)-Pb1-O(3)        | 55.266(32)  | O(3)#6-Li(1)-O(1)#3 | 108.5(13) |
| O(7)-Pb1-O(6)#2      | 107.485(32) | O(3)#6-Li(1)-O(6)   | 124.9(15) |
| O(7)-Pb1-O(6)#11     | 126.537(30) | O(1)#3-Li(1)-O(6)   | 103.0(11) |
| O(4)#3-Pb1-O(1)#13   | 123.035(36) | O(3)#6-Li(1)-O(6)#7 | 110.5(13) |
| O(4)#3-Pb1-O(3)      | 77.346(33)  | O(1)#3-Li(1)-O(6)#7 | 106.4(12) |
| O(4)#3-Pb1-O(6)#2    | 133.981(32) | O(6)-Li(1)-O(6)#7   | 102.0(11) |

---

Symmetry transformations used to generate equivalent atoms:

|                            |                           |                          |
|----------------------------|---------------------------|--------------------------|
| #1 $x+1/2, -y+1/2, z$      | #2 $-x+1/2, y+1/2, z+1/2$ | #3 $x, y, z-1$           |
| #4 $x-1/2, -y+1/2, z+1$    | #5 $x, y, z+1$            | #6 $x+1/2, -y+1/2, z-1$  |
| #7 $-x+1, -y, z-1/2$       | #8 $-x+1/2, y-1/2, z-1/2$ | #9 $-x+1, -y, z+1/2$     |
| #10 $x-1/2, -y+1/2, z-1$   | #11 $x-1/2, -y+1/2, z$    | #12 $x+1/2, -y+1/2, z+1$ |
| #13 $-x+1/2, y+1/2, z-1/2$ |                           |                          |

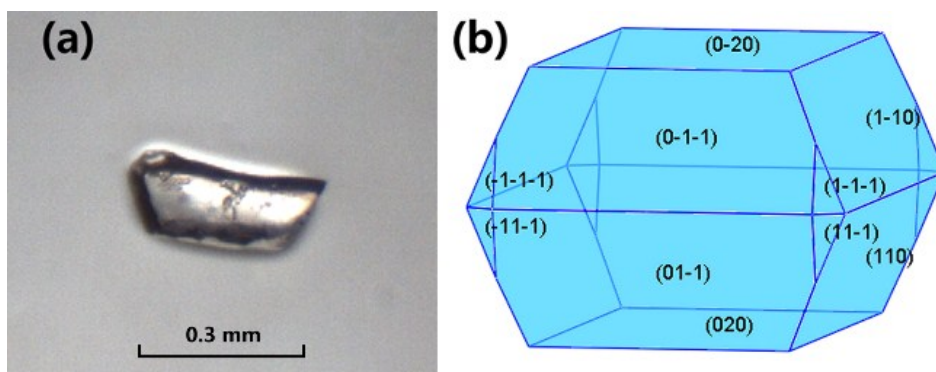

**Fig. S1** (a) Photo of  $\text{LiPbPO}_4$  single crystal by spontaneous crystallization; (b) Theoretical morphology of  $\text{LiPbPO}_4$ .

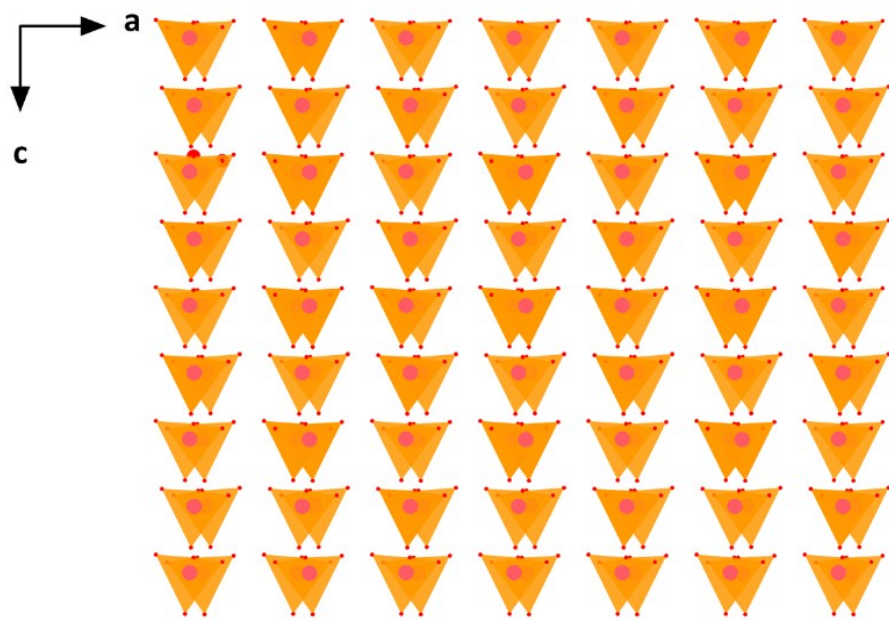

**Fig. S2** Anionic groups arrangement of the PO<sub>4</sub> tetrahedra for LiPbPO<sub>4</sub>

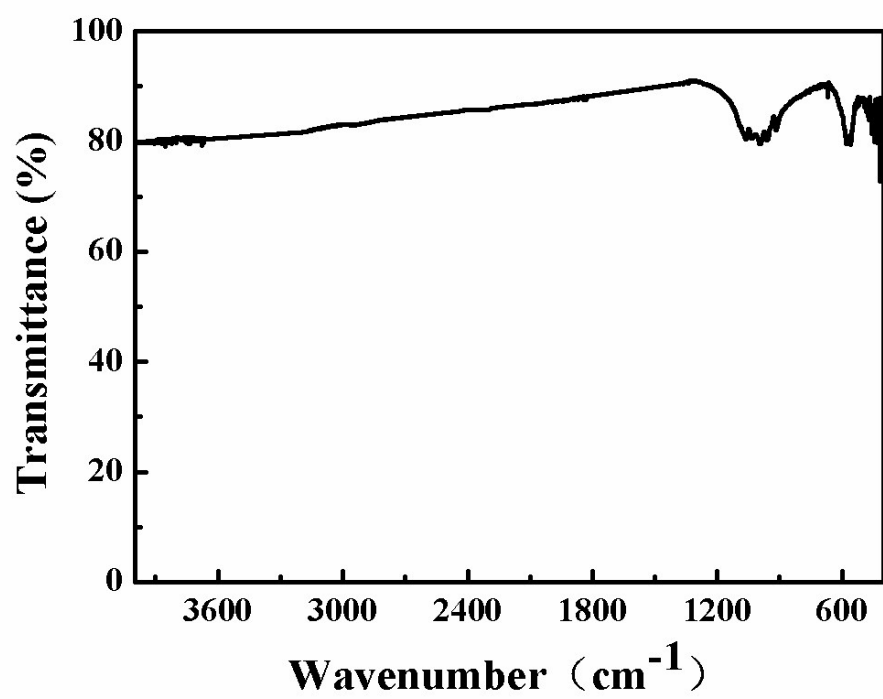

Fig. S3 The IR spectrum of as-synthesized LiPbPO<sub>4</sub>.

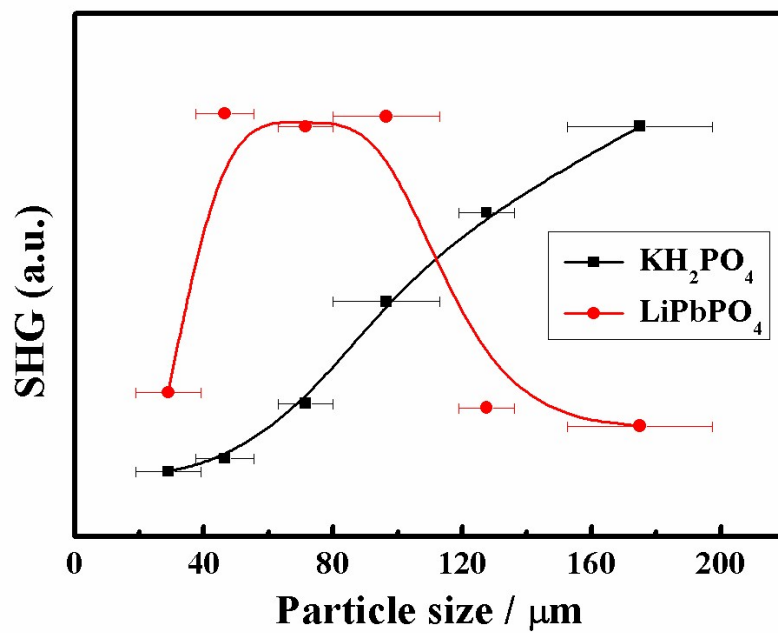

**Fig. S4** SHG phase- matching curve, particle size vs SHG efficiency for  $\text{LiPbPO}_4$ . (The curve drawn is to guide the eye and is not a fit to the data.)



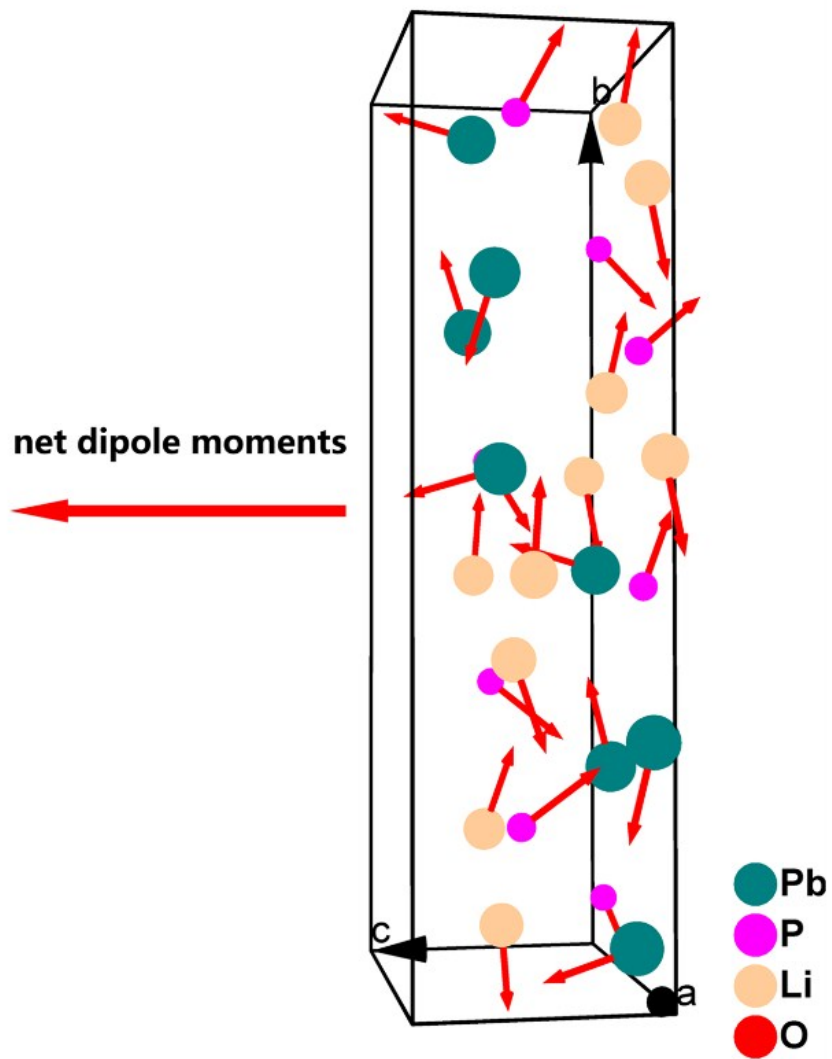

**Fig. S5** The dipole moments for the  $\text{PO}_4$  tetrahedra, the  $\text{LiO}_4$  tetrahedra and the  $\text{PbO}_8$  polyhedra in the unit cells of  $\text{LiPbPO}_4$ . The red arrows indicate the approximate direction of the dipole moments.

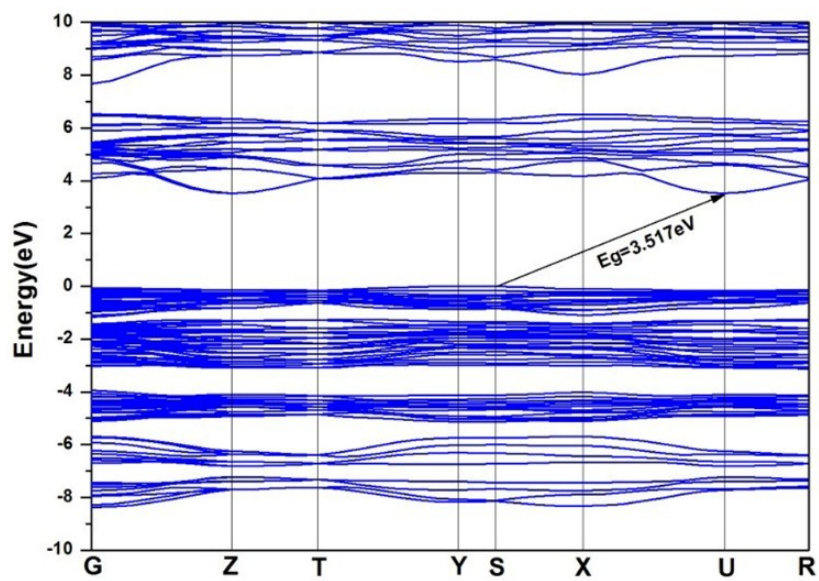

**Fig. S6** The calculated band structure of LiPbPO<sub>4</sub>
